# Supplementary material for: Water Uptake by Evaporating pMDI Aerosol Prior to Inhalation Affects Both Regional and Total Deposition in the Respiratory System
Source: MDPI journal article supplement (doi:10.3390/pharmaceutics13070941), 2021-06-24
Supplement: s1 [file s1]

# Supplementary Materials: Water Uptake by Evaporating pMDI Aerosol Prior to Inhalation Affects Both Regional and Total Deposition in the Respiratory System

Victoria Legh-Land, Allen E. Haddrell, David Lewis, Darragh Murnane and Jonathan P. Reid

**Table S1.** Algebraic Expressions for Aerodynamic and Thermodynamic Deposition by Mouth Breathing in the ICRP Model (adapted from ICRP 66. *Annals of the ICRP*, 1994).

|            |     | Aerodynamic                             |                                                       |        | Thermodynamic                 |                          |        |                                                                                   |
|------------|-----|-----------------------------------------|-------------------------------------------------------|--------|-------------------------------|--------------------------|--------|-----------------------------------------------------------------------------------|
|            |     | a(ICRP)                                 | R <sub>(ICRP)</sub>                                   | p      | a(ICRP)                       | R <sub>(ICRP)</sub>      | p      |                                                                                   |
| Inhalation | ET* | 1.1 x 10 <sup>-4</sup>                  | $d_{ae}^2 (\dot{V} SF_t^3)^{0.6} (V_T SF_t^2)^{-0.2}$ | 1.4    | 9.0                           | $D(\dot{V} SF_t)^{-1/4}$ | 0.5    | 1                                                                                 |
|            | BB  | 4.08 x 10 <sup>-6</sup>                 | $d_{ae}^2 \dot{V} SF_t^{2.3}$                         | 1.152  | $22.02 SF_t^{1.24} \Psi_{th}$ | D <sub>tB</sub>          | 0.6391 | 1-(V <sub>D</sub> (ET)/V <sub>T</sub> )                                           |
|            | bb  | 0.1147                                  | $(0.056 + t_b^{1.5}) \times d_{ae}^{t_b^{-0.25}}$     | 1.173  | $-76.8 + 167 SF_b^{0.65}$     | D <sub>tB</sub>          | 0.5676 | 1-[(V <sub>D</sub> (ET)+V <sub>D</sub> (BB))/V <sub>T</sub> ]                     |
|            | AI  | 0.146 x SF <sub>A</sub> <sup>0.98</sup> | $d_{ae}^2 t_A$                                        | 0.6495 | $170 + 103 SF_A^{2.13}$       | D <sub>tA</sub>          | 0.6101 | 1-[(V <sub>D</sub> (ET)+V <sub>D</sub> (BB)+V <sub>D</sub> (bb))/V <sub>T</sub> ] |
| Exhalation | bb  | 0.1147                                  | $(0.056 + t_b^{1.5}) \times d_{ae}^{t_b^{-0.25}}$     | 1.173  | $-76.8 + 167 SF_b^{0.65}$     | D <sub>tB</sub>          | 0.5676 | 1-[(V <sub>D</sub> (ET)+V <sub>D</sub> (BB))/V <sub>T</sub> ]                     |
|            | BB  | 2.04 x 10 <sup>-6</sup>                 | $d_{ae}^2 \dot{V} SF_t^{2.3}$                         | 1.152  | $22.02 SF_t^{1.24} \Psi_{th}$ | D <sub>tB</sub>          | 0.6391 | 1-(V <sub>D</sub> (ET)/V <sub>T</sub> )                                           |
|            | ET* | 1.1 x 10 <sup>-4</sup>                  | $d_{ae}^2 (\dot{V} SF_t^3)^{0.6} (V_T SF_t^2)^{-0.2}$ | 1.4    | 9.0                           | $D(\dot{V} SF_t)^{-1/4}$ | 0.5    | 1                                                                                 |

\*For this region alternative equation is used to determine the aerodynamic Regional Deposition Efficiency,  $\eta_{ae}$ .

$$\eta_{ae} = 1 - 1 / (a_{(ICRP)} R_{(ICRP)} p_{(ICRP)} + 1).$$

$d_{ae}$  Aerodynamic diameter

SF Scaling factor to account for subject's size (see Table S-2)

D Diffusion constant

$\Psi_{th}$  Empirical correction factor to account for the turbulent airflow in the initial generations of the tracheal-bronchial tree

t Residence time (s) in a given region (region indicated by subscript).

**Table S2.** Physiological Parameters used in the ICRP Model (adapted from ICRP 66. *Annals of the ICRP*, 1994).

| Parameter                                                  | Female (Sitting) | Male (Sitting) |
|------------------------------------------------------------|------------------|----------------|
| Functional Residual Capacity (FRC) (mL)                    | 2681             | 3301           |
| Extrathoracic Dead Space (V <sub>D</sub> (ET)) (mL)        | 40               | 50             |
| Bronchi and Tracheal Dead Space (V <sub>D</sub> (BB)) (mL) | 40               | 49             |
| Bronchiole Dead Space (V <sub>D</sub> (bb)) (mL)           | 44               | 47             |
| Tracheal Scale Factor (SF <sub>t</sub> )                   | 1.08             | 1.00           |
| Bronchiolar Scale Factor (SF <sub>b</sub> )                | 1.04             | 1.00           |
| Respiratory Bronchiole Scale Factor (SF <sub>a</sub> )     | 1.07             | 1.00           |
| Tidal Volume (V <sub>T</sub> ) (mL)                        | 464              | 750            |
| Volumetric Flow Rate ( $\dot{V}$ ) (mL s <sup>-1</sup> )   | 217              | 300            |

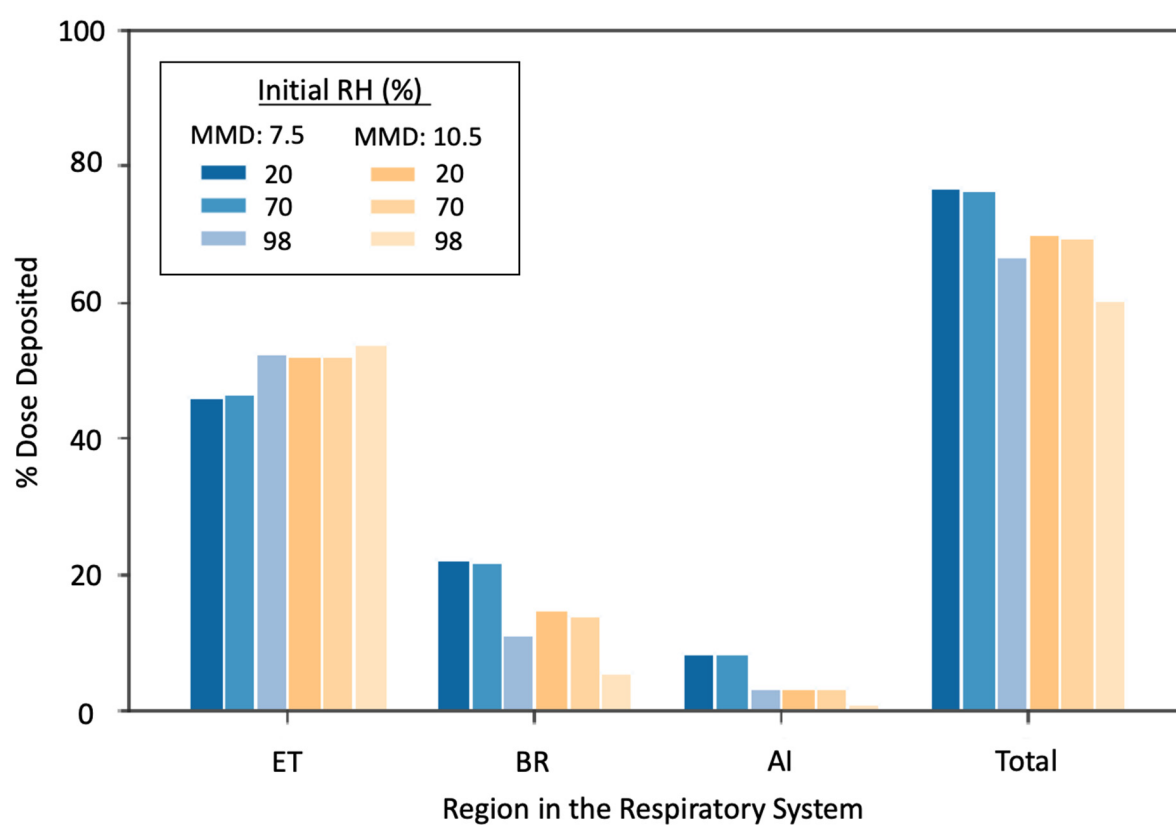

**Figure S1.** The regional and total dosage depositions in the respiratory system of two glycerol droplet distributions (MMAD: 7.5, 10.5, GSD: 1.8, 1.8) initially equilibrated in either 20, 70 or 98 % RH. ICRP simulation set to an adult Caucasian male who was seated.
